# Supplementary material
Source: Royal Society of Chemistry journal article supplement (doi:10.1039/d6ew00112b)
Supplement: d6ew00112b1.pdf [file d6ew00112b1.pdf]

## Supplementary Material

# Microplastics in Water: Challenges in Measurement and Regulation, and a Path Towards Mass-Based Metrics

*Macarena Munoz\**, *Jorge García*, *David Ortiz*, *Diego Rodríguez-Llorente*, *Zahara M. de Pedro* and  
*Jose A. Casas*

Departamento de Ingeniería Química, Universidad Autónoma de Madrid, Ctra. Colmenar km 15, 28049  
Madrid, Spain

\*Corresponding author phone: +34 91 497 3991; fax: +34 91497 3516; e-mail:  
[macarena.munnoz@uam.es](mailto:macarena.munnoz@uam.es)

**Keywords: Microplastics, water, wastewater treatment plants, Microplastics quantification, mass-based metrics, standardization.**

**Table S1.** Method validation data: recoveries and RSD values obtained for the reference material (PS) and cryo-milled PE and PP microplastics across different size fractions.

| <b>Polymer</b> | <b>Size (<math>\mu\text{m}</math>)</b>                                                                    | <b>Spiked MPs (<math>\text{mg L}^{-1}</math>)</b> | <b>Recovery (%)</b> | <b>RSD (%)</b> |
|----------------|-----------------------------------------------------------------------------------------------------------|---------------------------------------------------|---------------------|----------------|
| PS             | Reference material<br>(D10 = 91 $\mu\text{m}$ ,<br>D50 = 206 $\mu\text{m}$ ,<br>D90 = 311 $\mu\text{m}$ ) | 1                                                 | 97.50               | 6.44           |
|                |                                                                                                           | 10                                                | 98.82               | 1.72           |
|                |                                                                                                           | 20                                                | 105.63              | 7.94           |
| PP             | <50                                                                                                       | 5                                                 | 92.93               | 4.49           |
|                | 50 - 100                                                                                                  |                                                   | 98.56               | 3.1            |
|                | 100 - 250                                                                                                 |                                                   | 90.42               | 1.2            |
| PE             | 100 - 250                                                                                                 | 5                                                 | 95.88               | 3.58           |
|                |                                                                                                           | 10                                                | 98.25               | 4.55           |
|                |                                                                                                           | 20                                                | 98.06               | 3.47           |
